# Supplementary material for: SAXS Reveals the Stabilization Effects of Modified Sugars on Model Proteins
Source: MDPI journal article supplement (doi:10.3390/life12010123), 2022-01-15
Supplement: s1 [file s1]

## **SAXS Reveals the Stabilization Effects of Modified-Sugars on Model Proteins**

Astra Piccinini <sup>1</sup>, Eva C. Lourenço <sup>2</sup>, Osvaldo S. Ascenso <sup>2</sup>, Maria Rita Ventura <sup>3</sup>, Heinz Amenitsch <sup>4</sup>, Paolo Moretti <sup>1</sup>, Paolo Mariani <sup>1</sup>, Maria Grazia Ortore <sup>1</sup> and Francesco Spinozzi <sup>1,\*</sup>

<sup>1</sup> Department of Life and Environmental Sciences, Polytechnic University of Marche, 60131 Ancona, Italy; a.piccinini@pm.univpm.it (A.P.); p.moretti@pm.univpm.it (P.M.); p.mariani@univpm.it (P.M.); m.g.ortore@univpm.it (M.G.O.)

<sup>2</sup> Extremochem, Rua Ivone Silva, 1050-124 Lisboa, Portugal; eva.lourenco@extremochem.com (E.C.L.); osvaldo.ascenso@extremochem.com (O.S.A.)

<sup>3</sup> Instituto de Tecnologia Química e Biológica António Xavier, Universidade Nova de Lisboa, 2780-157 Oeiras, Portugal; rita.ventura@extremochem.com

<sup>4</sup> Institute for Inorganic Chemistry, Graz University of Technology, 8010 Graz, Austria; amenitsch@tugraz.at

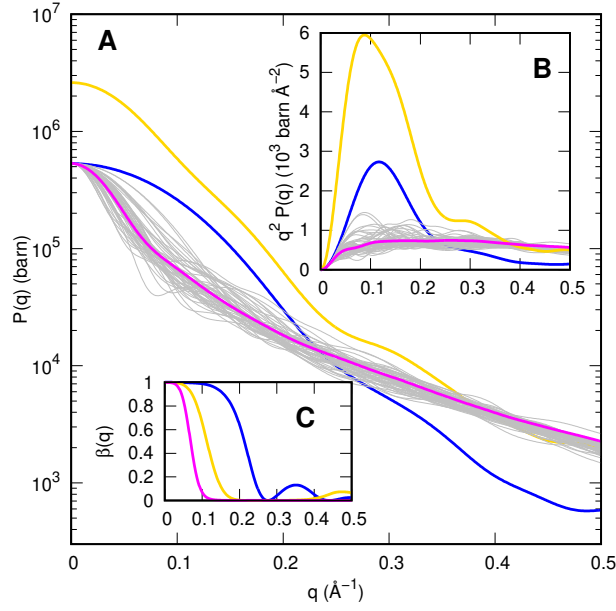

Figure S1: Form factors of the  $N_s = 3$  states of MB calculated with the SASMOL method<sup>1</sup>. The blue curve represents the form factor of the native state ( $N$ ) obtained on the basis of the PDB entry 1wla<sup>2</sup>. The gold curve is the form factor of the intermediate ( $I$ ) dimeric state calculated from the PDB entry 3vm9<sup>3</sup>. Grey curves are the form factors of the 50 conformations obtained by FOX<sup>4</sup>, whose average, corresponding to the the unfolded state ( $U$ ), is represented by the magenta curve. Form factors are shown in the semi-logarithmic (panel **A**) and in the Kratky (panel **B**) plots. Coupling functions are reported in panel **C**.

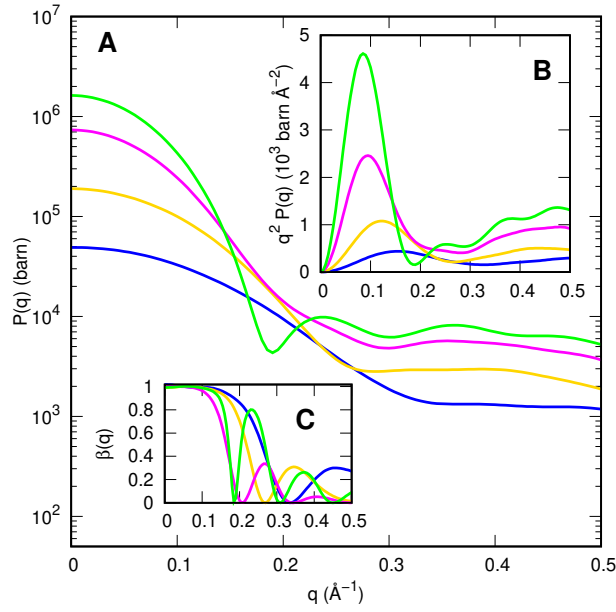

Figure S2: Form factors of the  $N_s = 4$  states of IN calculated with the SASMOL method. Curves of monomer (1), dimer (2), tetramer (4) and hexamer (6) states, calculated from the PDB entry 3aiy<sup>5</sup>, by selecting chains A-B, A-D, A-H and A-L, respectively, are shown in blue, gold, magenta and green, respectively. Form factors are shown in the semi-logarithmic (panel **A**) and in the Kratky (panel **B**) plots. Coupling functions are reported in panel **C**.

| buffer pH | G     | $C_G$<br>M | pH   | MB $Z_N$ | IN $Z_1$ |
|-----------|-------|------------|------|----------|----------|
| 5.00      | —     | —          | 5.00 | 17.6     |          |
| 5.00      | EC101 | 0.05       | 5.15 | 16.8     |          |
| 5.00      | EC101 | 0.10       | 5.25 | 16.4     |          |
| 5.00      | EC101 | 0.25       | 5.35 | 15.9     |          |
| 5.00      | EC202 | 0.05       | 5.10 | 17.0     |          |
| 5.00      | EC202 | 0.10       | 5.20 | 16.6     |          |
| 5.00      | EC202 | 0.25       | 5.30 | 16.1     |          |
| 3.00      | —     | —          | 3.00 |          | 4.7      |
| 3.00      | EC101 | 0.05       | 3.80 |          | 2.8      |
| 3.00      | EC101 | 0.10       | 4.15 |          | 1.9      |
| 3.00      | EC101 | 0.25       | 4.50 |          | 1.0      |

Table S1: Experimental pH values determined as a function of the concentration of EC101 or EC202 modified-sugar dissolved in 10 mM phosphate buffer at pH = 3 or pH = 5 and corresponding number of elementary charges for the  $N$ -state of myoglobin and for the 1-state of insulin.

| Symbol                                    | Description                                                                                 | Unit                     | Min          | Max   | Ref. |
|-------------------------------------------|---------------------------------------------------------------------------------------------|--------------------------|--------------|-------|------|
| $\alpha_w$                                | water thermal expansivity                                                                   | $10^{-4} \text{ K}^{-1}$ | <b>2.5</b>   |       | 6    |
| $\beta_w$                                 | first derivative of water thermal expansivity                                               | $10^{-6} \text{ K}^{-2}$ | <b>9.8</b>   |       | 6    |
| $\alpha_P$                                | protein thermal expansivity                                                                 | $10^{-4} \text{ K}^{-1}$ | <b>1.15</b>  |       | 7    |
| $\alpha_G$                                | modified-sugar thermal expansivity                                                          | $10^{-4} \text{ K}^{-1}$ | <b>3.9</b>   |       | 8    |
| $\nu_{W_b}^\circ$                         | bulk water molar volume at $T_o$                                                            | L                        | <b>0.018</b> |       | 6    |
| $\nu_P^\circ$                             | MB monomer molar volume at $T_o$                                                            | L                        | <b>12.95</b> |       | 1a   |
| $\nu_{G_b}^\circ$                         | bulk modified-sugar molar volume at $T_o$                                                   | L                        | <b>0.12</b>  |       |      |
| $I_0$                                     | ionic strength due to charged buffer molecules                                              | mM                       | 1            | 20    |      |
| $\Delta G_{W, \text{nel}, j_1 j_2}^\circ$ | non-electrostatic reference Gibbs free energy change at the $j_1 j_2$ transition            | $\text{kJ mol}^{-1}$     | -200         | 200   |      |
| $\Delta S_{W, j_1 j_2}^\circ$             | reference entropy change at the $j_1 j_2$ transition                                        | $\text{J mol}^{-1}$      | -200         | 200   |      |
| $\Delta C_{pW, j_1 j_2}$                  | heat capacity at constant pressure change at the $j_1 j_2$ transition                       | $\text{J mol}^{-1}$      | -10000       | 10000 |      |
| $\Delta G_{\text{exj}}^\circ$             | modified-sugar water exchange reference Gibbs free energy change over the $j$ -state        | $\text{kJ mol}^{-1}$     | -10          | 10    |      |
| $\Delta S_{\text{exj}}^\circ$             | modified-sugar water exchange reference entropy change over the $j$ -state                  | $\text{J mol}^{-1}$      | -10          | 10    |      |
| $\Delta C_{p\text{exj}}$                  | modified-sugar water exchange heat capacity at constant pressure change over the $j$ -state | $\text{J mol}^{-1}$      | -10          | 10    |      |
| $d_j$                                     | relative mass density of the $j$ -state hydration water                                     |                          | 0.9          | 1.15  | 9    |
| $R_N$                                     | average radius of $N$ -MB state                                                             | $\text{\AA}$             | 12           | 18    |      |
| $R_I$                                     | average radius of $I$ -MB state                                                             | $\text{\AA}$             | 20           | 40    |      |
| $R_U$                                     | average radius of $U$ -MB state                                                             | $\text{\AA}$             | 30           | 70    |      |
| $Z_N$                                     | number of elementary charges of $N$ -MB                                                     |                          | see Table S1 |       |      |
| $J$                                       | protein-protein contact energy                                                              | $\text{kJ mol}^{-1}$     | 0            | 1000  | 10   |
| $d$                                       | attractive potential scale length                                                           | $\text{\AA}$             | 0.5          | 100   | 10   |

Table S2: Overview of the model parameters and their validity range used in the global-fit analysis of  $N_c = 92$  SAXS curves of MB samples. Fixed parameters are shown in bold. <sup>a</sup> Value obtained with the SASMOL method. The total number of fitting parameters are 242, corresponding to  $\approx 2.6$  parameters per curve.

| Symbol                            | Description                                                                                 | Unit                     | Min          | Max   | Ref. |
|-----------------------------------|---------------------------------------------------------------------------------------------|--------------------------|--------------|-------|------|
| $\alpha_w$                        | water thermal expansivity                                                                   | $10^{-4} \text{ K}^{-1}$ | <b>2.5</b>   |       | 6    |
| $\beta_w$                         | first derivative of water thermal expansivity                                               | $10^{-6} \text{ K}^{-2}$ | <b>9.8</b>   |       | 6    |
| $\alpha_P$                        | protein thermal expansivity                                                                 | $10^{-4} \text{ K}^{-1}$ | <b>1.15</b>  |       | 7    |
| $\alpha_G$                        | modified-sugar thermal expansivity                                                          | $10^{-4} \text{ K}^{-1}$ | <b>3.9</b>   |       | 8    |
| $\nu_{W_b}^\circ$                 | bulk water molar volume at $T_o$                                                            | L                        | <b>0.018</b> |       | 6    |
| $\nu_P^\circ$                     | IN monomer molar volume at $T_o$                                                            | L                        | <b>4.32</b>  |       | 1a   |
| $\nu_{G_b}^\circ$                 | bulk modified-sugar molar volume at $T_o$                                                   | L                        | <b>0.12</b>  |       |      |
| $I_0$                             | ionic strength due to charged buffer molecules                                              | mM                       | 1            | 20    |      |
| $\Delta \bar{G}_{W,nel,12}^\circ$ | non-electrostatic reference Gibbs free energy change at the 12 transition (Eq. 26)          | $\text{kJ mol}^{-1}$     | -50          | 0     | 11   |
| $\Delta \bar{G}_{W,nel,24}^\circ$ | non-electrostatic reference Gibbs free energy change at the 24 transition (Eq. 26)          | $\text{kJ mol}^{-1}$     | -30          | 30    | 11   |
| $\Delta \bar{G}_{W,nel,46}^\circ$ | non-electrostatic reference Gibbs free energy change at the 46 transition (Eq. 26)          | $\text{kJ mol}^{-1}$     | -30          | 30    | 11   |
| $\Delta \bar{S}_{W,j_1j_2}^\circ$ | reference entropy change at the $j_1j_2$ transition (Eq. 26)                                | $\text{J mol}^{-1}$      | -40          | 40    |      |
| $\Delta \bar{C}_{pW,j_1j_2}$      | heat capacity at constant pressure change at the $j_1j_2$ transition (Eq. 26)               | $\text{J mol}^{-1}$      | -10000       | 10000 |      |
| $\Delta G_{exj}^\circ$            | modified-sugar water exchange reference Gibbs free energy change over the $j$ -state        | $\text{kJ mol}^{-1}$     | -10          | 10    |      |
| $\Delta S_{exj}^\circ$            | modified-sugar water exchange reference entropy change over the $j$ -state                  | $\text{J mol}^{-1}$      | -10          | 10    |      |
| $\Delta C_{pexj}$                 | modified-sugar water exchange heat capacity at constant pressure change over the $j$ -state | $\text{J mol}^{-1}$      | -10          | 10    |      |
| $d_j$                             | relative mass density of the $j$ -state hydration water                                     |                          | 0.9          | 1.15  | 9    |
| $R_1$                             | average radius of 1-IN state                                                                | $\text{\AA}$             | 10           | 20    |      |
| $R_2$                             | average radius of 2-IN state                                                                | $\text{\AA}$             | 10           | 30    |      |
| $R_4$                             | average radius of 4-IN state                                                                | $\text{\AA}$             | 15           | 35    |      |
| $R_6$                             | average radius of 6-IN state                                                                | $\text{\AA}$             | 15           | 45    |      |
| $Z_1$                             | number of elementary charges of 1-IN                                                        |                          | see Table S1 |       |      |
| $J$                               | protein-protein contact energy                                                              | $\text{kJ mol}^{-1}$     | 0            | 1000  | 10   |
| $d$                               | attractive potential scale length                                                           | $\text{\AA}$             | 0.5          | 100   | 10   |

Table S3: Overview of the model parameters and their validity range used in the global-fit analysis of  $N_c = 40$  SAXS curves of IN samples. Fixed parameters are shown in bold. <sup>a</sup> Value obtained with the SASMOL method. The total number of fitting parameters are 122, corresponding to  $\approx 3.0$  parameters per curve.

## S1 Numerical determination of $x_j$ and $\phi_j$

By assuming small values of  $X_P$  and  $x_G$ , in a 0<sup>th</sup> approximation, on the basis of Eq. 12 and 17, we fix  $X_{W_b}^{(0)} \simeq (1 - X_P)(1 - x_G)$  and  $x_{G_b}^{(0)} \simeq x_G(1 - X_P)$ . We calculate the charge  $Z_j$  of any protein state and, by assuming in the 0<sup>th</sup> approximation  $I_{ci} \simeq 0$ , we calculate the related electrostatic free energy  $G_{W,el,j}$  from Eq. 14. Hence from Eq. 8 we derive a 0<sup>th</sup> approximation of  $\phi_j$  according to  $\phi_j^{(0)} \simeq K_{exj}(1 - x_{G_b}^{(0)}) / (K_{exj} - (K_{exj} - 1)x_{G_b}^{(0)})$ . Subsequently, by entering  $\phi_j^{(0)}$  in Eqs. 15-16, we derive  $\langle \nu \rangle^{(0)}$  and  $C_P^{(0)}$ . By substituting these values into Eq. 10, we derive a 0<sup>th</sup> approximation of  $K_{1j}^{(0)}$  and of the fraction of  $j$ -proteins  $x_j^{(0)} \simeq \alpha_j (K_{1j}^{(0)} x_1^{(0)})^{\alpha_j} (C_P^{(0)})^{\alpha_j - 1}$  (with  $j = 2, N_s$ ), all depending on the unknown variable  $x_1^{(0)}$ . By entering the values of  $x_j^{(0)}$  in Eq. 3, we obtain an equation with a unique variable  $x_1^{(0)}$ , comprised between 0 and 1, which can be numerically solved. Subsequently, by entering the values of  $x_j^{(0)}$  in Eqs. 12-16, we derive a 1<sup>st</sup> approximation of the variables  $X_{W_b}^{(1)}$ ,  $x_{G_b}^{(1)}$ ,  $\langle \nu \rangle^{(1)}$ ,  $C_P^{(1)}$  and  $I_{ci}$ . Hence, again from Eq. 8, we derive 1<sup>st</sup> approximations of  $\phi_j^{(1)}$  and, from these ones, 1<sup>st</sup> approximations of  $K_{1j}^{(1)}$  and, finally of  $x_j^{(1)}$ . The iteration is repeated until  $|x_j^{(i)} - x_j^{(i-1)}| < \tau$  and  $|\phi_j^{(i)} - \phi_j^{(i-1)}| < \tau$ , where  $\tau$  is a small value in the order of  $10^{-10}$ .

## S2 Minimization of the merit function

The merit function  $\mathcal{H}$  is minimized by using two numerical methods, both integrated in the GENFIT software. The first method exploits a Simulated Annealing (SA) procedure. All the fitting parameters are randomly moved within their validity range: a move that decreases  $\mathcal{H}$  ( $\Delta\mathcal{H} \leq 0$ ) is always accepted, whereas a move that increases  $\mathcal{H}$  is accepted with probability  $e^{-\Delta\mathcal{H}/T^*}$ , where  $T^*$  is a temperature-like parameter. The initial value of  $T^*$  is set to  $\mathcal{H}_0/2$ , where  $\mathcal{H}_0$  is the value of the merit function corresponding to a first random choice of the fitting parameters. This high value of  $T^*$  ensures that the minimization starts by accepting most of the random moves, avoiding to get stuck in local minima. Every  $N_c$  random moves of the fitting parameters (referred to as a sub-run),  $T^*$  is decreased by a constant factor (i.e. the system is “cooled”) so that the path along the space of the parameters is guided toward the global minimum of  $\mathcal{H}$ . We have chosen a total of  $N_s = 50$  sub-runs formed by  $N_c = 50$  random moves. The second method is based on the well-known simplex (SX) algorithm for solving numerically linear programming problems<sup>12</sup> and is applied to the set of fitting parameters that has been obtained by the SA method. The coupled SA-SX procedure is repeated for  $N_I = 20$  independent iterations and, for each repetition, all the SAXS curves are

randomly sampled from a Gaussian centered around the experimental value  $\frac{d\Sigma}{d\Omega}_{k,\text{expt}}(q_i)$  with standard deviation  $\sigma_k(q_i)^{13}$ . In this manner, a robust determination of the mean value  $\langle X \rangle$  and the standard deviation  $\sigma_X$  of each fitting parameters is achieved.

### S3 Calculation of $S(q)$

The modification of the PY structure factor  $S_0(q)$  caused by the two Yukawian terms of the pair potential within the RPA approximation is

$$S(q) = \frac{S_0(q)}{1 + \beta \langle n \rangle S_0(q) [U_{YC}(q) + U_{YA}(q)]}, \quad (\text{S1})$$

$$S_0(q) = \left\{ 1 - \frac{12\eta[\eta(3 - \eta^2) - 2]}{(1 - \eta)^4} \frac{j_1(2qR)}{2qR} \right\}^{-1}. \quad (\text{S2})$$

These equations contain the protein volume fraction,  $\eta = \langle n \rangle \frac{4}{3}\pi R^3$ , and the isotropic Fourier Transform of the Yukawa potential, which reads  $U_{Yk}(q) = 4\pi B_{1k}(B_{2k} \sin(2qR) + q \cos(2qR))/(q^3 + qB_{2k}^2)$ , with  $k = \text{C}$  and  $\text{A}$  and  $\beta = 1/(k_B T)$ . The average number density  $\langle n \rangle$  is calculated within the thermodynamic model according to  $\langle n \rangle = \langle \alpha^{-1} \rangle n$ , with  $n = C_P/N_A$ . The function  $j_1(x)$  is the 1<sup>st</sup> order spherical Bessel function.



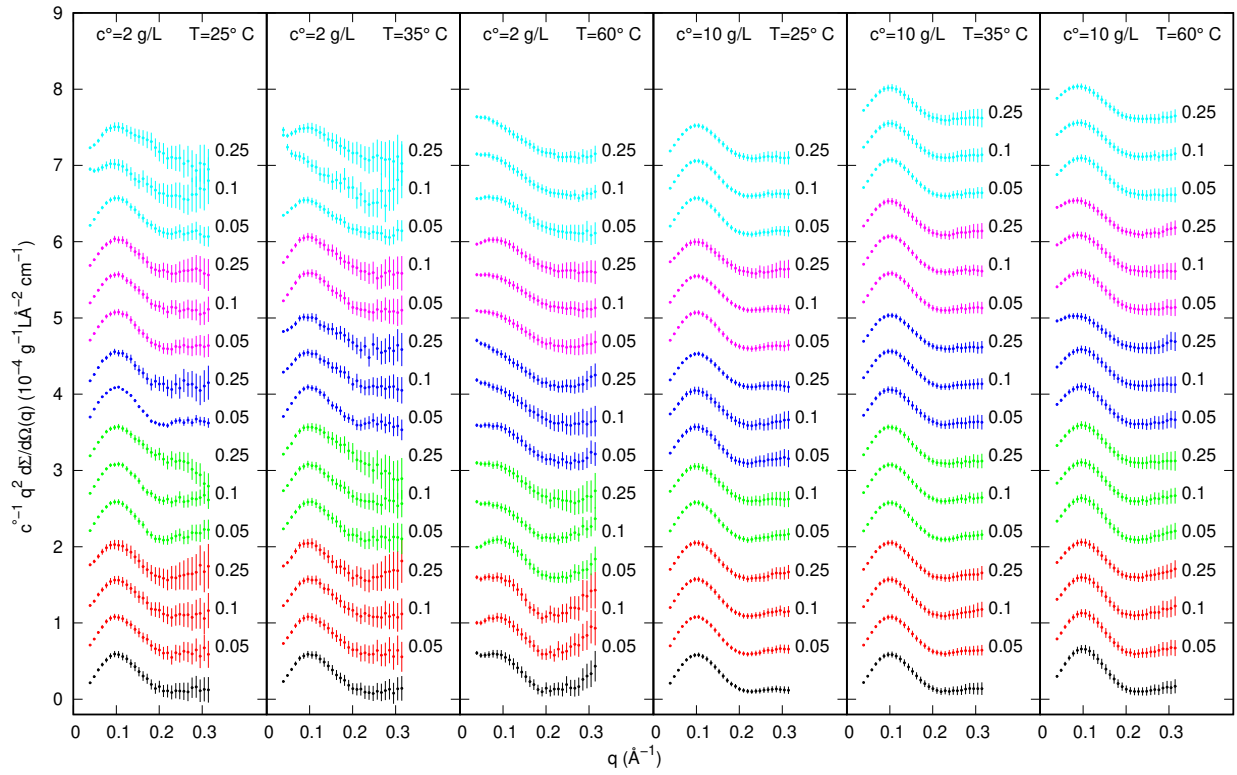

Figure S3: Kratky plots of the experimental SAXS curves of MB in 10 mM phosphate buffer (pH = 5) with and without ExtremoChem modified-sugar. Colors refer to the following conditions: no-modified-sugar (black), EC312 (red), EC101 (green), EC311 (blue), EC202 (magenta), EC212 (cyan). Whenever present, the modified-sugar concentration is reported on the right side of each curve in molar unit. Each column refers to a fixed temperature and MB concentration, as indicated on the top. Curves have been divided by the nominal w/v MB concentration ( $c^\circ$ ) and, in the same column, have been scaled by the factor 1 (in the unity of the  $y$ -axis). Experimental standard deviations are reported as error bars every 10 points, for clarity.

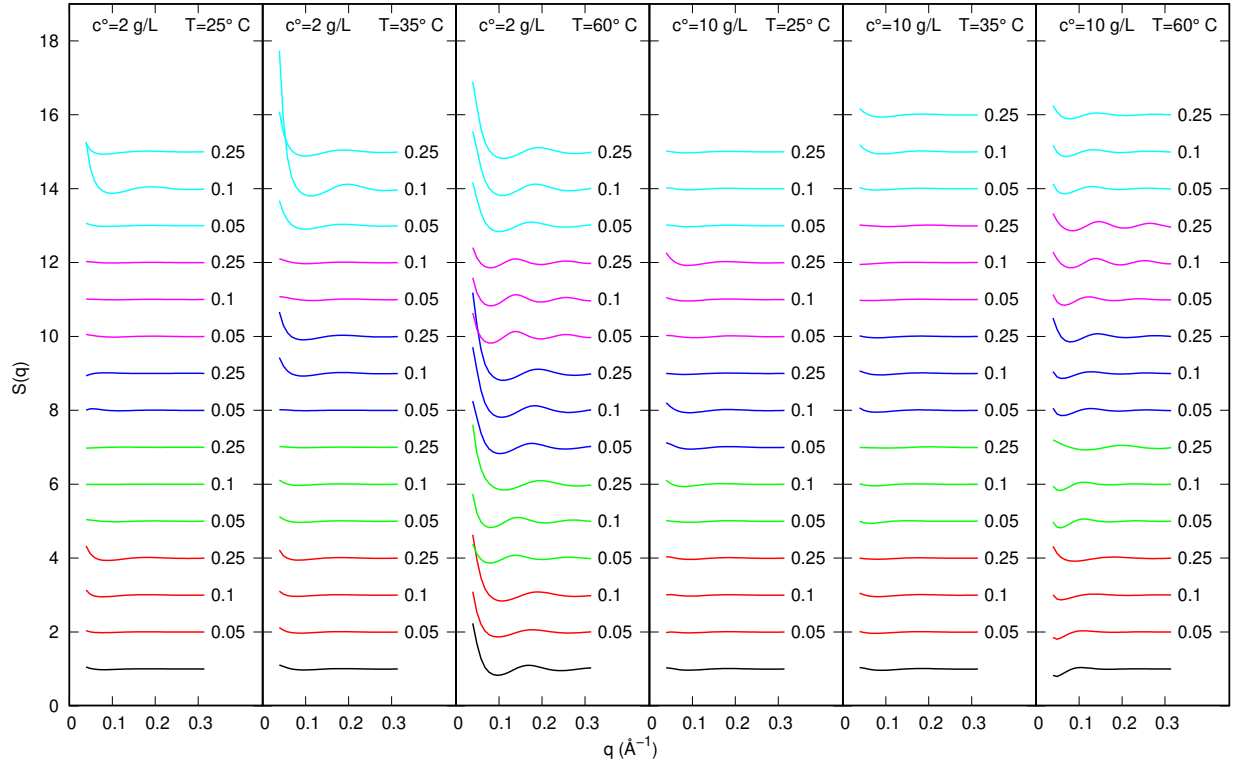

Figure S4: Protein-protein structure factors obtained by the analysis of SAXS data of MB samples shown in Figure 3. Curves are scaled by a factor 1 for clarity.

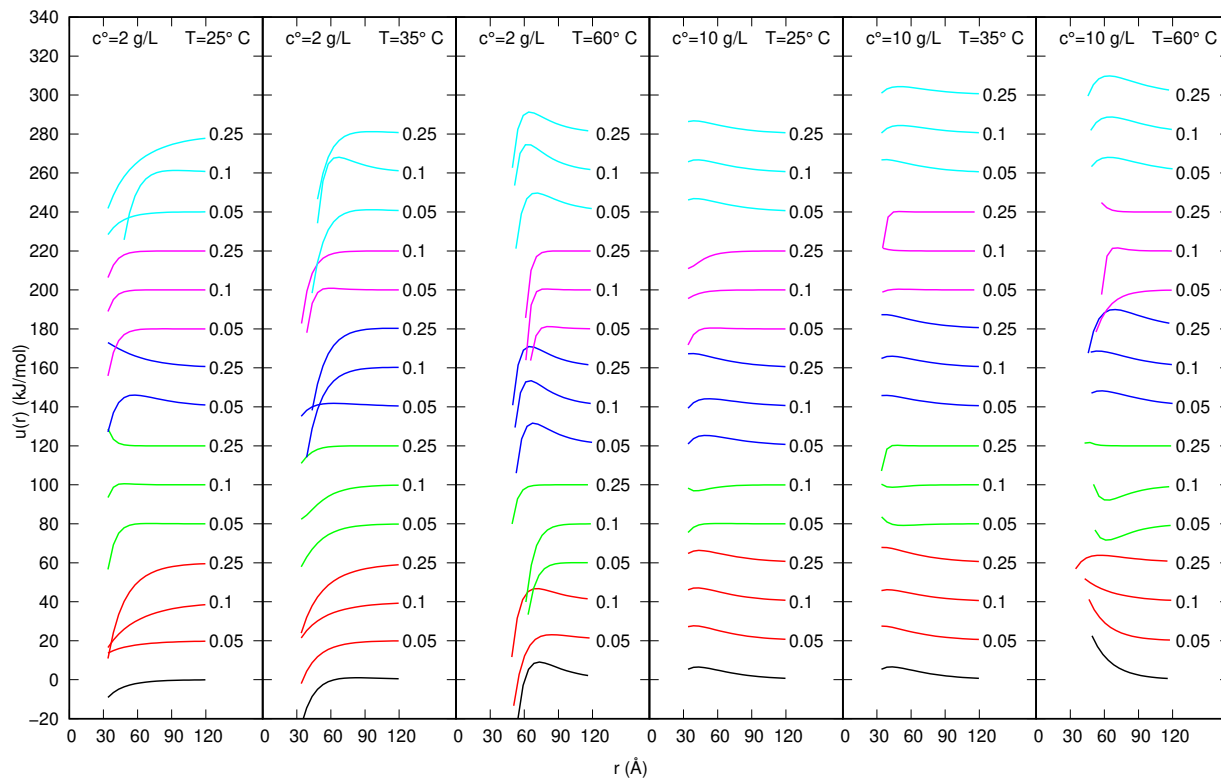

Figure S5: Protein-protein pair potentials obtained by the analysis of SAXS data of MB samples shown in Figure 3. Curve are scaled by a factor 20 kJ/mol for clarity.

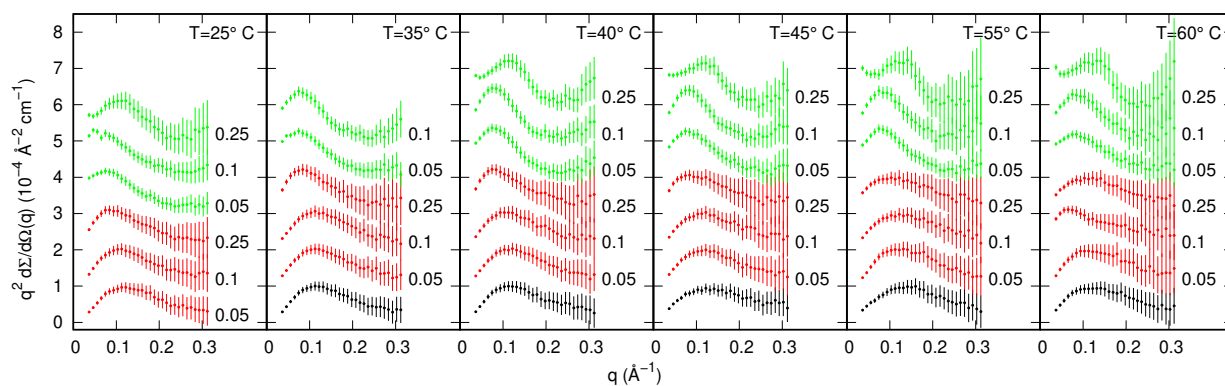

Figure S6: Kratky plots of the experimental SAXS curves of 2 g/L IN in 10 mM phosphate buffer (pH = 3) with and without ExtremoChem modified-sugar. Colors refer to the following conditions: no-modified-sugar (black), EC312 (red), EC101 (green). Whenever present, the modified-sugar concentration is reported on the right side of each curve in molar unit. Each column refers to a fixed temperature, as indicated on the top. Curves in the same column have been scaled by the factor 1 (in the unity of the  $y$ -axis). Experimental standard deviations are reported as error bars every 10 points, for clarity.

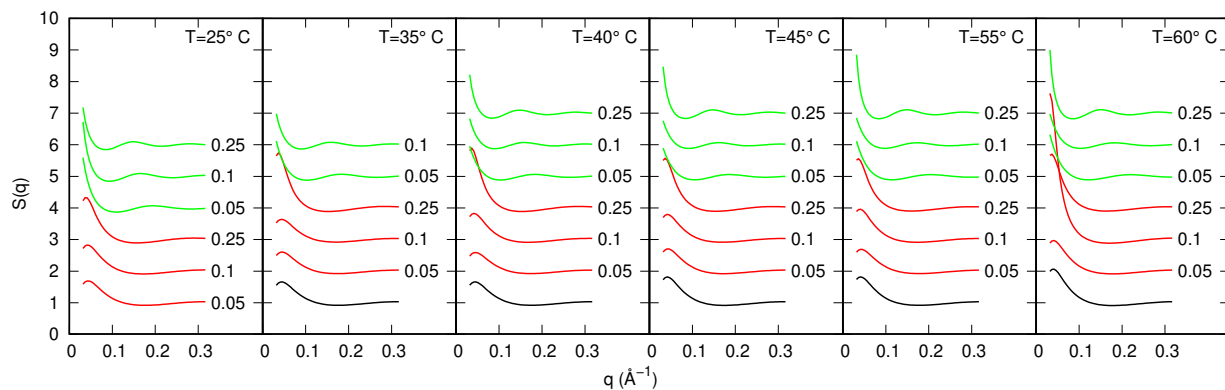

Figure S7: Protein-protein structure factors obtained by the analysis of SAXS data of IN samples shown in Figure 5. Curves are scaled by a factor 1 for clarity.

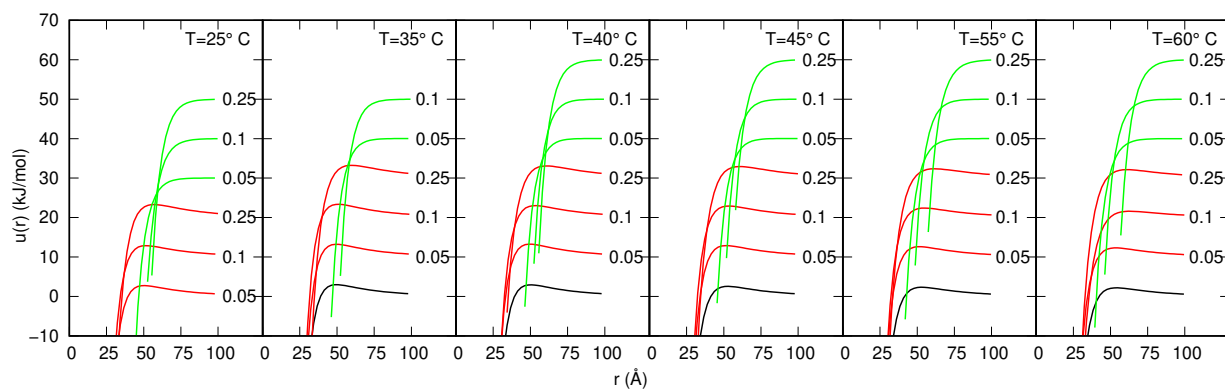

Figure S8: Protein-protein pair potentials obtained by the analysis of SAXS data of IN samples shown in Figure 5. Curve are scaled by a factor 10 kJ/mol for clarity.

## References

- [1] Ortore, M. G.; Spinozzi, F.; Mariani, P.; Paciaroni, A.; Barbosa, L. R. S.; Amenitsch, H.; Steinhart, M.; Ollivier, J.; Russo, D. Combining structure and dynamics: non-denaturing high-pressure effect on lysozyme in solution. *J. R. Soc. Interface* **2009**, *6*, S619–S634.
- [2] Maurus, R.; Overall, C. M.; Bogumil, R.; Luo, Y.; Mauk, A.; Smith, M.; Brayer, G. D. A myoglobin variant with a polar substitution in a conserved hydrophobic cluster in the heme binding pocket. *BBA - Protein Structure and Molecular Enzymology* **1997**, *1341*, 1–13.
- [3] Nagao, S.; Osuka, H.; Yamada, T.; Uni, T.; Shomura, Y.; Imai, K.; Higuchi, Y.; Hirota, S. Structural and oxygen binding properties of dimeric horse myoglobin. *Dalton Trans.* **2012**, *41*, 11378–11385.
- [4] Moretti, P. Innovative methods to investigate intrinsically disordered proteins by X-ray and neutron scattering techniques. Ph.D. thesis, Life and Environmental Sciences, Ancona, 2019.
- [5] O'Donoghue, S. I.; Chang, X.; Abseher, R.; Nilges, M.; Led, J. J. Unraveling the symmetry ambiguity in a hexamer: Calculation of the R6 human insulin structure. *Journal of Biomolecular NMR* **2000**, *16*, 93–108.
- [6] Kell, G. S. Density, thermal expansivity, and compressibility of liquid water from 0.deg. to 150.deg.. Correlations and tables for atmospheric pressure and saturation reviewed and expressed on 1968 temperature scale. *J. Chem. Eng. Data* **1975**, *20*, 97–105.
- [7] Frauenfelder, H.; Hartmann, H.; Karplus, M.; Kuntz, I. D., Jr; Kuriyan, J.; Parak, F.; Petsko, G. A.; Ringe, D.; Tilton, R. F., Jr; Connolly, M. L. Thermal expansion of a protein. *Biochemistry* **1987**, *26*, 254–261.
- [8] Schellart, W. Rheology and density of glucose syrup and honey: Determining their suitability for usage in analogue and fluid dynamic models of geological processes. *Journal of Structural Geology* **2011**, *33*, 1079–1088.
- [9] Svergun, D.; Richard, S.; Koch, M. H. J.; Sayers, Z.; Kuprin, S.; Zaccai, G. Protein hydration in solution: experimental observation by X-ray, neutron scattering. *Proc. Natl. Acad. Sci. USA* **1998**, *95*, 2267–2272.

- [10] Spinozzi, F.; Mariani, P.; Ortore, M. G. Proteins in binary solvents. *Biophys. Rev.* **2016**, *8*, 87–106.
- [11] Jeffrey, P. D.; Coates, J. H. An Equilibrium Ultracentrifuge Study of the Self-Association of Bovine Insulin\*. *Biochemistry* **1966**, *5*, 489–498.
- [12] Murty, K. G. *Linear programming*; Wiley Subscription Services, Inc., A Wiley Company, 1983.
- [13] Spinozzi, F.; Ferrero, C.; Ortore, M. G.; Antolinos, A. D. M.; Mariani, P. GENFIT: software for the analysis of small-angle X-ray and neutron scattering data of macromolecules in-solution. *J. App. Cryst.* **2014**, *47*, 1132–1139.
